# Supplementary material for: Gram Stains: A Resource for Retrospective Analysis of Bacterial Pathogens in Clinical Studies
Source: PLoS One. 2012 Oct 11;7(10):e42898. doi: 10.1371/journal.pone.0042898 (PMC3469605; doi:10.1371/journal.pone.0042898)
Supplement: Table S1 — Lactobacillus proportions from genomic DNA extracted from pure cultures of different Lactobacillus species, and tested individually in the Lactobacillus qPCR. Lactobacillus strains were cultured overnight in MRS broth and genomic DNA was extracted. All sample DNA were tested in Lactobacillus qPCR assay and universal bacterial qPCR assay. Samples were run in triplicate and mean values presented. (XLSX) [file pone.0042898.s001.xlsx]

## Sheet: Sheet1
Lactobacillus species	qPCR Lactobacillus 16S rrn copies/ul	qPCR Universal bacteria 16S rrn copies/ul	Lactobacillus proportions
L. rhamnosis	5597.36	1661.3	3.36927
L. paracasei	5600.89	1259.06	4.44848
L. acidophilus	18964.1	2571.8	7.37384
L. crispatus	11685.8	1382.47	8.45285
L. johnsonii	12192.5	1372.59	8.88283
L. gallinerum	49867.4	5585.12	8.92862
L. intestinalis	47644.8	5307.3	8.97722
L. ruminus	34705.2	3550.81	9.77388
L. jensenii	16928.3	1567.88	10.7969
L. diolivorans	69005.6	6030.81	11.4422
L. kefiri	30924.5	2676.33	11.5548
L. fermentum	30577.4	2409.32	12.6913
L. gasseri	39665.4	3042.75	13.036
L. buchneri	93533.1	6741.67	13.8739
L. salivarius	115251	7986.29	14.4311
L. reuteri	51306.3	3507.13	14.6291
L. brevis	90500.6	6073.67	14.9005
L. acidipiscis	145305	8765.57	16.5768
L. animalis	55986.2	3342.31	16.7508
L. vaginalis	149355	8901.66	16.7783
L. zeae	51596.7	2970.81	17.3679
L. iners	221579	10956.5	20.2235
L. curvatus	57739.7	2636.23	21.9024

## Sheet: Sheet2
Sample	SQ Mean
L. acidipiscis	8765.57
L. acidophilus	2571.8
L. animalis	3342.31
L. brevis	6073.67
L. buchneri	6741.67
L. crispatus	1382.47
L. curvatus	2636.23
L. curvatus	1669.74
L. diolivorans	6030.81
L. fermentum	2409.32
L. gallinerum	5585.12
L. gasseri	3042.75
L. iners	10956.5
L. intestinalis	5307.3
L. jensenii	1567.88
L. johnsonii	1372.59
L. kefiri	2676.33
L. paracasei	1259.06
L. reuteri	3507.13
L. rhamnosis	1661.3
L. ruminus	3550.81
L. salivarius	7986.29
L. vaginalis	8901.66
L. zeae	2970.81
Pedicoccus acid	8032.41
